# Supplementary material for: Adult neural stem cells and neurogenesis are resilient to intermittent fasting
Source: PubMed Central journal article supplement (PMC10702802; doi:10.15252/embr.202357268), 2023-11-21
Supplement: EMBR-24-e57268-s003.pdf [file EMBR-24-e57268-s003.pdf]

# Appendix

## Adult neural stem cells and neurogenesis are resilient to intermittent fasting

Rut Gabarró-Solanas<sup>1,2</sup>, Amarbayasgalan Davaatseren<sup>1†</sup>, Justus Kleifeld<sup>1,2†</sup>, Tatjana Kepčija<sup>1</sup>, Thomas Köcher<sup>3</sup>, Albert Giralt<sup>4,5,6,7</sup>, Iván Crespo-Enríquez<sup>1</sup> and Noelia Urbán<sup>1,\*</sup>

<sup>1</sup>Institute of Molecular Biotechnology of the Austrian Academy of Sciences (IMBA), Vienna BioCenter (VBC), Dr. Bohr-Gasse 3, 1030 Vienna, Austria.

<sup>2</sup>Vienna BioCenter PhD Program, Doctoral School of the University of Vienna and Medical University of Vienna, A-1030, Vienna, Austria.

<sup>3</sup>Vienna BioCenter Core Facilities, Campus-Vienna-Biocenter 1, Vienna, Austria.

<sup>4</sup>Departament de Biomedicina, Facultat de Medicina, Institut de Neurociències, Universitat de Barcelona, Casanova 143, 08036 Barcelona, Spain.

<sup>5</sup>Institut d'Investigacions Biomèdiques August Pi i Sunyer (IDIBAPS), 08036 Barcelona, Spain.

<sup>6</sup>Centro de Investigación Biomédica en Red Sobre Enfermedades Neurodegenerativas (CIBERNED), 08036 Barcelona, Spain.

<sup>7</sup>Production and Validation Center of Advanced Therapies (Creatio), Faculty of Medicine and Health Science, University of Barcelona, 08036 Barcelona, Spain.

<sup>†</sup>Equal contribution.

\*Correspondence: noelia.urban@imba.oeaw.ac.at

### Table of Contents

|                               |          |
|-------------------------------|----------|
| <b>Appendix Figures</b> ..... | <b>2</b> |
| Appendix Figure S1.....       | 2        |
| Appendix Figure S2.....       | 3        |
| Appendix Figure S3.....       | 3        |
| <b>Appendix Tables</b> .....  | <b>4</b> |
| Appendix Table S1.....        | 4        |
| Appendix Table S2.....        | 4        |
| Appendix Table S3.....        | 4        |
| Appendix Table S4.....        | 4        |
| Appendix Table S5.....        | 5        |
| Appendix Table S6.....        | 5        |
| Appendix Table S7.....        | 5        |

## Appendix Figure S1

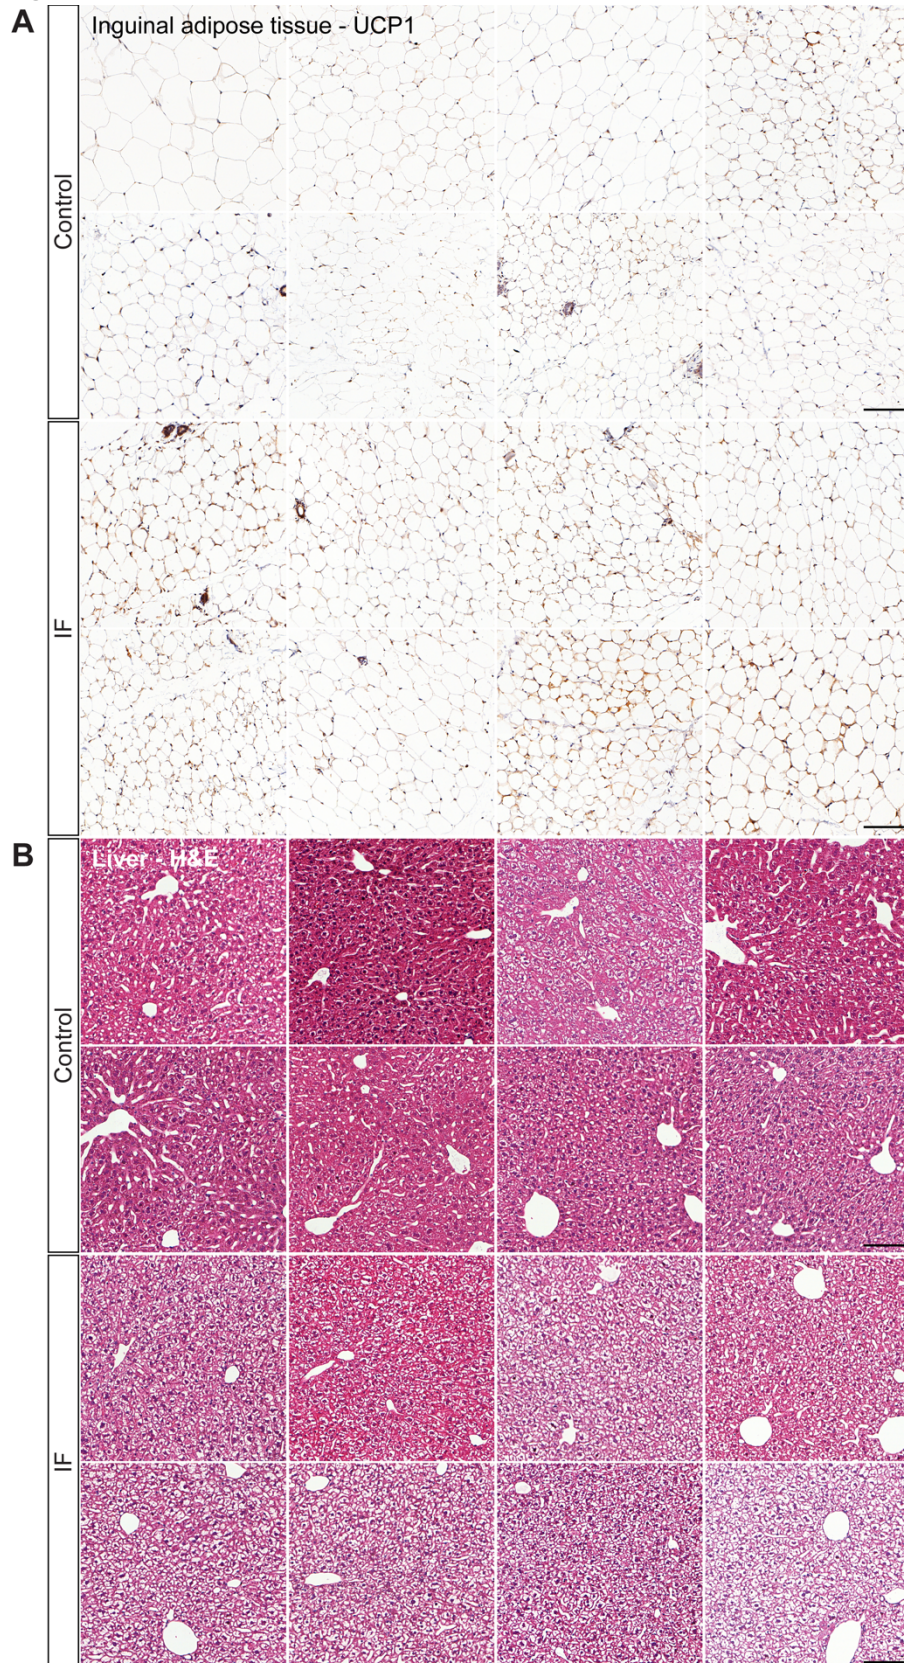

**Appendix Figure S1. Images of all samples used for evaluation of adipose browning and liver remodelling.** (A) Night-time IF promotes mild and variable browning of inguinal adipose tissue. Images of inguinal adipose tissue stained for uncoupling protein 1 (UCP1) of control and mice that underwent 3 months of IF.

*Legend continues on next page.*

(B) Hepatocytes display edematous morphology upon night-time IF. Images of H&E-stained liver of control and mice that underwent 3 months of IF.

Data information: 8 mice per condition were randomly chosen from the experiment shown in **Figure 3** for immunohistochemical evaluation. Each image corresponds to an individual mouse including those shown in **Figure 1J, K**. Scale bars: 100µm.

## Appendix Figure S2

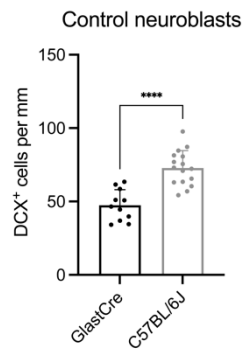

### Appendix Figure S2. Differences in basal levels of neurogenesis between mouse strains.

Neuroblasts (DCX<sup>+</sup> cells) normalised to DG length per 40 µm thick section in Glax-CreERT2;RYFP and C57BL/6J mice. The neurogenic rate (shown as number of neuroblasts) is a 40% lower in 5-month-old Glax-CreERT2;RYFP mice with a mixed genetic background than in C57BL/6J mice of matched age.  $n_{\text{GlaxCre}}=11$ ,  $n_{\text{C57BL/6J}}=16$ . Two-tailed unpaired t-test,  $p<0.0001$ . Bars and error bars represent average + s.d., dots represent individual mice.

## Appendix Figure S3

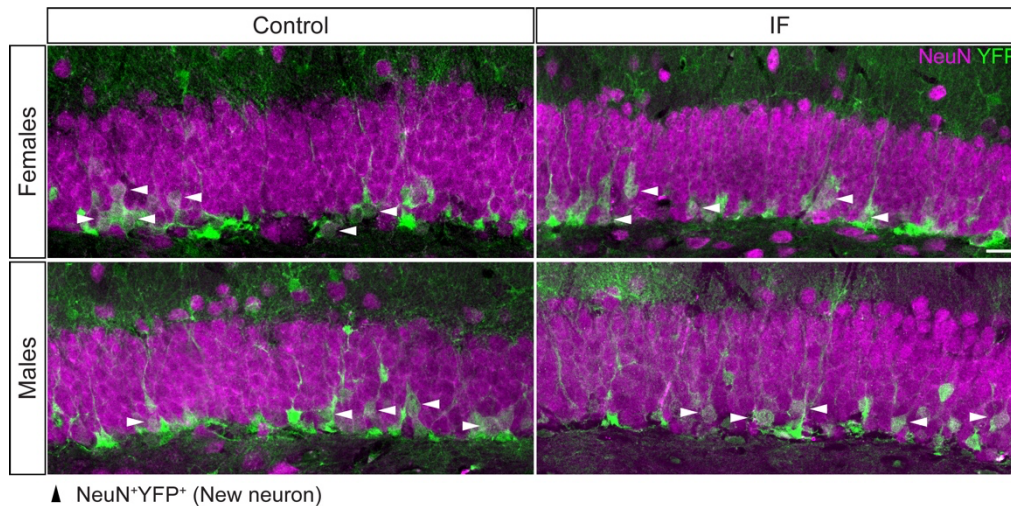

### Appendix Figure S3. New neurons segregated by sex.

Images of newly born neurons (arrowheads) in male and female mice after 3 months of IF. Neurons were identified by the colocalization of the mature neuronal marker NeuN and the YFP reporter, indicating that these neurons were generated from the population of NSCs labelled with YFP at the beginning of the diet. Images from female mice correspond to those shown in **Figure 4D**. Scale bar: 20µm.

**Appendix Table S1: Statistics (p-values) for Figure 4**

| Comparison                           | Test                          | Figure 4B | Figure 4D | Figure 4F |
|--------------------------------------|-------------------------------|-----------|-----------|-----------|
| 1 month:Control vs. 1 month:IF       | Tuckey's multiple comparisons | 0.3419    | 0.8764    | 0.7228    |
| 1 month:Control vs. 3 months:Control |                               | <0.0001   | <0.0001   | <0.0001   |
| 1 month:Control vs. 3 months:IF      |                               | <0.0001   | <0.0001   | <0.0001   |
| 1 month:IF vs. 3 months:Control      |                               | <0.0001   | <0.0001   | <0.0001   |
| 1 month:IF vs. 3 months:IF           |                               | 0.0007    | <0.0001   | <0.0001   |
| 3 months:Control vs. 3 months:IF     |                               | 0.4195    | >0.9999   | 0.9993    |

**Appendix Table S2: Statistics (p-values) for Figure 5**

| Comparison                        | Test                          | Figure 5A | Figure 5B |
|-----------------------------------|-------------------------------|-----------|-----------|
| Females:Control vs. Females:IF    | Tuckey's multiple comparisons | 0.5085    | 0.9875    |
| Females:Control vs. Males:Control |                               | 0.7384    | 0.7961    |
| Females:Control vs. Males:IF      |                               | 0.0159    | 0.9129    |
| Females:IF vs. Males:Control      |                               | 0.9862    | 0.9188    |
| Females:IF vs. Males:IF           |                               | 0.1952    | 0.9829    |
| Males:Control vs. Males:IF        |                               | 0.1243    | 0.9942    |

**Appendix Table S3: Statistics (p-values) for Figure EV1A and B**

| Comparison              | Test                         | Figure EV1A | Figure EV1B |
|-------------------------|------------------------------|-------------|-------------|
| Interaction             | Two-way ANOVA                | 0.0001      | 0.1794      |
| Time/day                |                              | 0.0085      | <0.0001     |
| Diet                    |                              | 0.3591      | 0.1794      |
| C vs. IF: Feeding day   | Šídák's multiple comparisons | 0.9852      | 0.9994      |
| C vs. IF: Fasting night |                              | 0.0764      | 0.2036      |
| C vs. IF: Fasting day   |                              | 0.0002      | 0.9417      |
| C vs. IF: Feeding night |                              | 0.6015      | 0.3798      |

**Appendix Table S4: Statistics (p-values) for Figure EV1G**

| Comparison | Test                         | Day 3         | Day 6         | Day 9         | Day 12        | Day 15        |
|------------|------------------------------|---------------|---------------|---------------|---------------|---------------|
| C vs. IF   | Šídák's multiple comparisons | 0.0001        | 0.9879        | 0.0001        | 0.7987        | 0.0302        |
|            |                              | <b>Day 18</b> | <b>Day 21</b> | <b>Day 24</b> | <b>Day 27</b> | <b>Day 30</b> |
|            |                              | 0.8353        | 0.3365        | 0.1114        | 0.5805        | 0.4729        |
|            |                              | <b>Day 33</b> | <b>Day 36</b> | <b>Day 39</b> | <b>Day 42</b> | <b>Day 45</b> |
|            |                              | 0.1083        | 0.9999        | 0.0104        | 0.9999        | 0.0288        |
|            |                              | <b>Day 48</b> | <b>Day 51</b> | <b>Day 54</b> | <b>Day 57</b> | <b>Day 60</b> |
|            |                              | 0.9999        | 0.2874        | 0.9999        | 0.0046        | 0.9999        |
|            |                              | <b>Day 63</b> | <b>Day 66</b> | <b>Day 69</b> | <b>Day 72</b> | <b>Day 75</b> |
|            |                              | 0.0002        | 0.9999        | 0.0023        | 0.9999        | 0.0007        |
|            |                              | <b>Day 78</b> | <b>Day 81</b> | <b>Day 84</b> |               |               |
| 0.9952     | 0.0001                       | 0.9999        |               |               |               |               |

**Appendix Table S5: Statistics (p-values) for Figure EV4**

| Comparison  | Test          | Figure EV4A        | Figure EV4B        | Figure EV4C        | Figure EV4D        | Figure EV4E        |
|-------------|---------------|--------------------|--------------------|--------------------|--------------------|--------------------|
| Interaction | Two-way ANOVA | 0.1449             | 0.0086             | 0.5967             | 0.623              | 0.9395             |
| Sex         |               | 0.7684             | 0.4551             | 0.659              | 0.7919             | 0.4346             |
| Diet        |               | 0.8517             | 0.9871             | 0.4492             | 0.5975             | 0.2039             |
|             |               | <b>Figure EV4F</b> | <b>Figure EV4G</b> | <b>Figure EV4H</b> | <b>Figure EV4I</b> | <b>Figure EV4J</b> |
| Interaction |               | 0.5182             | 0.5568             | 0.5747             | 0.6541             | 0.6496             |
| Sex         |               | 0.3228             | 0.3819             | 0.977              | 0.3495             | 0.6781             |
| Diet        |               | 0.1024             | 0.0685             | 0.4906             | 0.9623             | 0.7145             |
|             |               | <b>Figure EV4K</b> | <b>Figure EV4L</b> |                    |                    |                    |
| Interaction |               | 0.7581             | 0.5355             |                    |                    |                    |
| Sex         |               | 0.8321             | 0.7421             |                    |                    |                    |
| Diet        |               | 0.4295             | 0.9447             |                    |                    |                    |

**Appendix Table S6: Additional statistics (p-values) for Figure EV4B**

| Comparison                        | Test                          | Figure EV4B |
|-----------------------------------|-------------------------------|-------------|
| Females:Control vs. Females:IF    | Tuckey's multiple comparisons | 0.1392      |
| Females:Control vs. Males:Control |                               | 0.0503      |
| Females:Control vs. Males:IF      |                               | 0.9552      |
| Females:IF vs. Males:Control      |                               | 0.9417      |
| Females:IF vs. Males:IF           |                               | 0.5246      |
| Males:Control vs. Males:IF        |                               | 0.2829      |

**Appendix Table S7: Statistics (p-values) for Figure EV5**

| Comparison           | Test                         | Figure EV5A | Figure EV5B |
|----------------------|------------------------------|-------------|-------------|
| Interaction          | Two-way ANOVA                | 0.0134      | 0.1296      |
| Section              |                              | <0.0001     | <0.0001     |
| Diet                 |                              | <0.0001     | <0.0001     |
| C vs. IF: Section 1  | Šídák's multiple comparisons | >0.9999     | 0.1696      |
| C vs. IF: Section 2  |                              | >0.9999     | <0.0001     |
| C vs. IF: Section 3  |                              | <0.0001     | 0.0002      |
| C vs. IF: Section 4  |                              | 0.0024      | 0.0002      |
| C vs. IF: Section 5  |                              | 0.0591      | 0.0002      |
| C vs. IF: Section 6  |                              | 0.0023      | 0.013       |
| C vs. IF: Section 7  |                              | 0.251       | 0.0167      |
| C vs. IF: Section 8  |                              | 0.0337      | 0.0374      |
| C vs. IF: Section 9  |                              | 0.9998      | 0.8         |
| C vs. IF: Section 10 |                              | 0.4996      | 0.9522      |
| C vs. IF: Section 11 |                              | 0.3671      |             |
